# Supplementary material for: GC-TOF/MS-Based Metabolomics Analysis to Investigate the Antimicrobial Activity of N-Acetylcysteine in the Plant-Pathogen Xanthomonas Citri Subsp. Citri
Source: Research Square preprint supplement (doi:10.21203/rs.3.rs-228895/v1), 2021-02-24
Supplement: Supplementary file 2 [file 97b98b7c6dba4bd9867120b6.xlsx]

## Sheet: Supplementary Table S3
GC-TOF/MS-based metabolomics analysis to investigate the antimicrobial activity of N-Acetylcysteine in the plant-pathogen Xanthomonas citri subsp. citri
Simone Cristina Picchi, Mariana de Souza e Silva, Luiz Leonardo Saldanha, Henrique Ferreira Marco Aurélio Takita, Camila Caldana and Alessandra Alves de Souza
Relative metabolite levels in the Xanthomonas citri cells under control used for k-means clustering
The metabolite levels of each time point was normalized to the time point 0h (before treatment). Only metabolites which levels were significantly different from the control are displayed in this list (t-test, p-value <0,05)
	Time (h)							k-means cluster
	0	1	2	4	6	12	24
Similar to Acetoacetate	1	1.08	1.18023	1.33364	1.61841	2.20293	2.5196	1
Valine	1	1.0839	1.16364	1.3166	1.65217	2.83759	3.42909	1
Glycine	1	1.08175	1.26395	1.48106	1.9948	6.10023	15.5934	1
Threonine	1	0.971807	1.11723	1.16637	1.35292	1.62013	2.08328	1
Uracil	1	1.02927	0.989556	1.03116	0.870466	2.46255	6.48439	1
trans-4-Hydroxyproline	1	1.19678	1.24436	2.37576	4.67855	40.341	132.516	1
4-Aminobutanoate	1	1.24632	1.20837	1.19276	1.07086	1.17085	1.87111	1
5-Oxoproline	1	0.89944	1.02235	0.947921	1.09453	1.33487	2.14151	1
Tyrosine	1	1.01994	1.17978	1.23104	1.3618	1.93251	3.42215	1
Lactate	1	0.915983	0.998839	0.834541	0.715033	0.546538	0.52167	2
Glycerol	1	0.814972	0.863085	0.689806	0.330351	0.0320231	0.0177832	2
Similar to Hydroxypyruvate	1	0.898224	0.979465	0.850783	0.774717	0.337212	0.227764	2
Serine	1	0.935683	1.05222	0.883798	0.793229	0.318069	0.20351	2
Asparagine	1	0.907479	1.18153	1.05153	0.910427	0.314622	0.17837	2
Shikimate	1	1.04233	0.960902	0.881897	0.680411	0.434587	0.432107	2
Adenine	1	1.00715	0.985922	0.895479	0.583592	0.034017	0.0177089	2
Heptadecanoate	1	0.940167	0.946035	0.829808	0.70767	0.516539	0.432483	2
Saccharopine	1	0.802278	0.892029	0.835718	0.720903	0.273818	0.225542	2
Trehalose	1	0.738346	0.867379	0.695894	0.653068	0.219782	0.138752	2
Alanine	1	1.12964	1.13803	1.1424	1.1949	1.04696	0.669933	3
Isoleucine	1	1.02011	1.12602	1.22551	1.39138	2.12974	1.60641	3
Proline	1	1.04829	1.16673	1.28917	1.54804	3.92028	3.04052	3
Benzoate	1	0.949138	0.980074	0.893597	0.823852	0.581388	0.516386	3
Phenylalanine	1	0.942573	1.05976	1.06432	1.15904	1.61022	1.54309	3
Talose	1	0.867741	0.873751	1.12879	1.18677	1.06332	0.714089	3
Galactitol	1	0.891469	0.916009	1.09989	1.1581	1.04291	0.73713	3
Glucose	1	0.863896	0.87221	1.12198	1.18384	1.06076	0.709725	3
Glutamine	1	1.31837	1.93271	3.72146	5.69648	5.51677	2.3835	3
Spermidine	1	0.796492	0.964739	1.61434	2.21402	1.37155	1.76563	3
Similar to Glycolate	1	0.865643	0.708458	0.600859	0.426446	0.555879	0.918819	4
Succinate	1	0.386883	0.273402	0.311148	0.200927	0.169244	0.26743	4
Mannose	1	1.03893	0.931456	0.852539	0.680341	0.421661	0.443819	4
